# Supplementary material for: Facile fabrication hybrids of TiO2@ZnO tubes with enhanced photocatalytic properties
Source: Royal Society of Chemistry journal article supplement (doi:10.1039/c6ra11065g), 2016-01-01
Supplement: c6ra11065g1.pdf [file c6ra11065g1.pdf]

## Facile Fabrication Hybrids of TiO<sub>2</sub>@ZnO Tubes with Enhanced Photocatalytic Properties

Minghui Wang,<sup>a</sup> Liying Cui,<sup>a</sup> Songyang Li,<sup>a</sup> Zhuoxin Li,<sup>a</sup> Tianliang Ma,<sup>a</sup> Guoyou Luan,<sup>a\*</sup> Wei Liu,<sup>b</sup> Fanli Zhang,<sup>a</sup>

<sup>a</sup> College of Resources and Environment, Jilin Agricultural University, Changchun 130118, People's Republic of China

<sup>b</sup> State Key Laboratory on Integrated Optoelectronics, College of Electronic Science and Engineering, Jilin University, 2699 Qianjin Street, Changchun, 130012, People's Republic of China

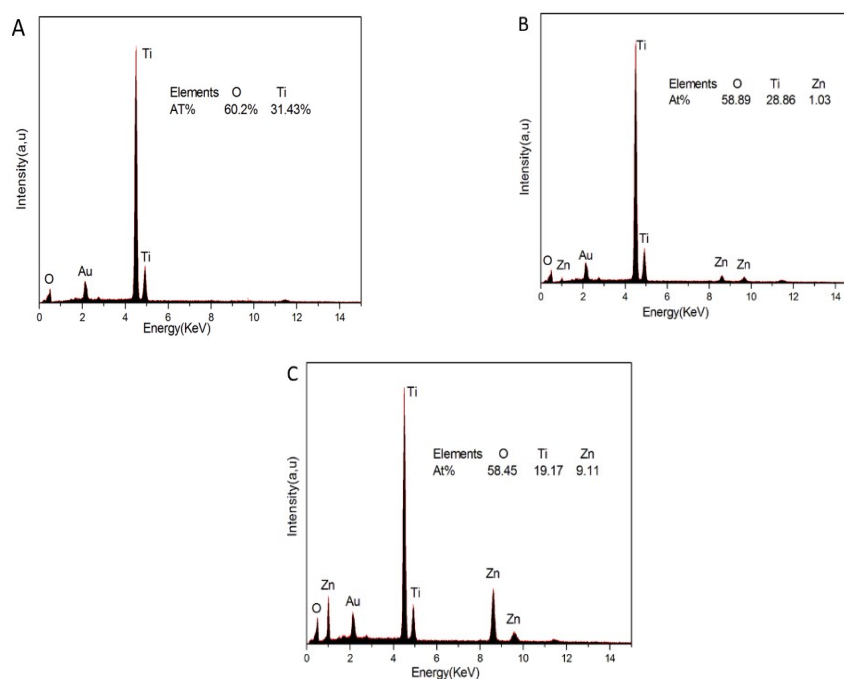

Fig. S1: The EDX spectra of samples (A Pure TiO<sub>2</sub> tubes; B TiO<sub>2</sub>@ZnO (0.01M); C TiO<sub>2</sub>@ZnO (0.1M))

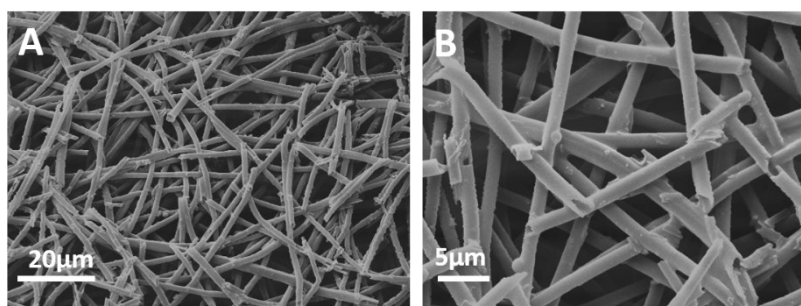

Fig. S2: The morphology of ZnO@TiO<sub>2</sub> hybrids after second repeated use (A The low magnification of SEM image; B The high magnification of SEM image of hybrids)
